# Supplementary material for: Microbial Safety and Sensory Analyses of Cold-Smoked Salmon Produced with Sodium-Reduced Mineral Salts and Organic Acid Salts
Source: MDPI journal article supplement (doi:10.3390/foods11101483), 2022-05-19
Supplement: s1 [file s1]

**Table S1.** Sensory attributes and their descriptions used in the sensory descriptive analysis of industrially produced CS salmon with salt replacers.

| Attribute                  | Description                                                                                                                         |
|----------------------------|-------------------------------------------------------------------------------------------------------------------------------------|
| <i>Smells</i>              |                                                                                                                                     |
| Sour smell                 | Organoleptic attribute of pure substances or mixtures which produces the sour sensation                                             |
| Fish smell                 | Relates to the smell of fish                                                                                                        |
| Smoke smell                | Describes the smell of smoke, campfire, or smoke condensate                                                                         |
| Cloying smell              | Describes an unfresh/sickening smell                                                                                                |
| Pungent                    | Describes a product causing a sharp sensation of the buccal and nasal mucous membranes.                                             |
| Rancid smell               | The intensity of all rancid smells (i.e. gras, hay, stearin, paint)                                                                 |
| Total smell intensity      | Describes the total intensity of smells                                                                                             |
| <i>Tastes and flavours</i> |                                                                                                                                     |
| Sour flavour               | Organoleptic attribute of pure substances or mixtures which produces the sour sensation                                             |
| Salty taste                | Describes the basic taste produced by diluted aqueous solutions of various substances such as sodium chloride                       |
| Bitter taste               | Describes the basic taste produced by diluted aqueous solutions of various substances such as quinine and caffeine                  |
| Umami taste                | Describes the basic taste of umami                                                                                                  |
| Fish flavour               | Relates to the flavour of raw fish                                                                                                  |
| Smoke flavour              | Describes the flavour of smoke, campfire, and smoke condensate                                                                      |
| Metal taste                | Describes the taste of metal (ferrous sulphate)                                                                                     |
| Cloying flavour            | Describes an unfresh/sickening taste/flavour                                                                                        |
| Rancid flavour             | Describes the intensity of all rancid flavours (i.e. gras, hay, stearin, paint)                                                     |
| <i>Texture</i>             |                                                                                                                                     |
| Hardness                   | Describes a mechanical texture attribute related to the force needed to bite through the sample. Evaluated by the first bite        |
| Juiciness                  | Describes a surface textural attribute that describes liquid emitted from a product. Fluid released from the sample after 4-5 chews |
| Tenderness                 | Describes a mechanical texture attribute related to time and number of chews necessary to swallow the sample                        |
| Gumminess                  | Describes the mechanical texture attribute related to the cohesiveness of a tender product (i.e. gummy)                             |
| Sticky                     | Describes the mechanical texture attribute related to the force required to remove material that adheres to the mouth               |
| Astringency                | Describes the organoleptic attribute of pure substances or mixtures which produces the astringent sensation                         |

---

|             |                                                                                                                                                                                |
|-------------|--------------------------------------------------------------------------------------------------------------------------------------------------------------------------------|
| After taste | The olfactory and/or gustatory sensation which occurs after the elimination of the product, and which differs from the sensation perceived whilst the product was in the mouth |
|-------------|--------------------------------------------------------------------------------------------------------------------------------------------------------------------------------|

---
