# Supplementary material for: Microbial Safety and Sensory Analyses of Cold-Smoked Salmon Produced with Sodium-Reduced Mineral Salts and Organic Acid Salts
Source: MDPI journal article supplement (doi:10.3390/foods11101483), 2022-05-19
Supplement: s1 [file s1]

**Table S3.** Sensory intensity scores of 23 sensory attributes related to smell, taste and texture of industrially produced CS salmon (Product no. P1-P6). Products associated with the same letters are not significantly different at 5% level.

|                       | P1_3% NaCl | P2_NaCl + KCl | P3_Nutek | P4_NaCl + Provian NDV | P5_Nutek + Provian NDV | P6_NaCl commercial product | <i>P-value</i> |
|-----------------------|------------|---------------|----------|-----------------------|------------------------|----------------------------|----------------|
| Sour smell            | 4.29 A     | 4.24 A        | 3.95 A   | 4.24 A                | 4.11 A                 | 3.53 A                     | 0.075          |
| Fish smell            | 3.71 A     | 3.78 A        | 3.74 A   | 3.76 A                | 3.62 A                 | 4.09 A                     | 0.911          |
| Smoke smell           | 5.04 A     | 5.13 A        | 4.82 A   | 5.14 A                | 5.23 A                 | 5.37 A                     | 0.052          |
| Cloying smell         | 1.94 A     | 1.87 A        | 1.96 A   | 1.91 A                | 1.98 A                 | 2.63 A                     | 0.278          |
| Pungent               | 1.27 A     | 1.23 A        | 1.31 A   | 2.06 A                | 1.97 A                 | 1.48 A                     | 0.012          |
| Rancid smell          | 1.53 A     | 1.46 A        | 1.47 A   | 1.43 A                | 1.44 A                 | 1.90 A                     | 0.200          |
| Total smell intensity | 5.21 A     | 5.16 A        | 5.09 A   | 5.27 A                | 5.26 A                 | 5.38 A                     | 0.311          |
| Sour flavour          | 4.02 A     | 3.66 AB       | 3.82 A   | 3.93 A                | 3.60 AB                | 3.26 B                     | <b>0.016</b>   |
| Salty taste           | 5.03 AB    | 4.70 AB       | 4.60 AB  | 4.89 AB               | 4.51 B                 | 5.15 A                     | <b>0.024</b>   |
| Bitter taste          | 3.96 A     | 4.09 A        | 4.05 A   | 3.94 A                | 4.13 A                 | 4.34 A                     | 0.585          |
| Umami taste           | 3.74 A     | 3.42 A        | 3.46 A   | 3.62 A                | 3.40 A                 | 3.40 A                     | 0.243          |
| Fish flavour          | 3.95 B     | 3.94 B        | 4.08 AB  | 3.91 B                | 3.60 B                 | 4.53 A                     | <b>0.036</b>   |
| Smoke flavour         | 5.06 AB    | 5.15 AB       | 4.84 B   | 5.34 A                | 5.16 AB                | 5.41 A                     | <b>0.016</b>   |
| Metal taste           | 3.71 B     | 3.88 AB       | 3.89 AB  | 3.64 B                | 3.73 B                 | 4.19 A                     | 0.249          |
| Cloying flavour       | 2.01 A     | 2.08 A        | 2.15 A   | 1.94 A                | 2.39 A                 | 2.44 A                     | 0.516          |
| Rancid flavour        | 1.55 A     | 1.61 A        | 1.43 A   | 1.60 A                | 1.47 A                 | 1.95 A                     | 0.099          |
| Hardness              | 3.78 B     | 4.04 AB       | 4.18 A   | 3.95 AB               | 4.14 A                 | 4.24 A                     | <b>0.010</b>   |
| Juiciness             | 4.69 A     | 4.67 A        | 4.71 A   | 4.80 A                | 4.60 A                 | 4.56 A                     | 0.559          |
| Tenderness            | 5.71 A     | 5.48 ABC      | 5.20 BC  | 5.63 AB               | 5.19 C                 | 5.45 ABC                   | <b>0.003</b>   |
| Gumminess             | 4.23 A     | 3.74 B        | 3.90 AB  | 3.76 B                | 3.63 B                 | 3.88 AB                    | <b>0.004</b>   |
| Sticky                | 4.35 A     | 3.97 AB       | 4.14 AB  | 3.71 B                | 3.74 B                 | 4.23 AB                    | <b>0.008</b>   |
| Astringency           | 3.75 A     | 3.72 A        | 3.65 A   | 3.68 A                | 3.84 A                 | 3.93 A                     | 0.625          |
| After taste           | 5.46 A     | 5.62 A        | 5.45 A   | 5.59 A                | 5.70 A                 | 5.92 A                     | 0.229          |
