# Supplementary material for: Microbial Safety and Sensory Analyses of Cold-Smoked Salmon Produced with Sodium-Reduced Mineral Salts and Organic Acid Salts
Source: MDPI journal article supplement (doi:10.3390/foods11101483), 2022-05-19
Supplement: s1 [file s1]

## Supplemental ANOVA data Table S2 - ANOVA tables

Five different analyses were performed, to test

- i) Effect of different mineral salts
- ii) Effect of Provian K
- iii) Effect of Provian NDV
- iv) Comparison of Provian K and Provian NDV
- v) Effect of Provian K/NDV with salt reduction

### Model selection and testing

For all ANOVA models applied, type III tests are performed due to imbalance as there are more observations on control samples than other treatments. For complex models' backward elimination using the AIC criterium (r-function step) was applied to reduce the model. In all cases where model selection was performed, we checked that the reduced model was not significantly different from the full model.

For all models the dependent variable is the log growth of *L. monocytogenes*. Days of storage (Day, 0, 7, 12, 19 and 29) and temperature (Temp, 4°C or 8°C) and their interaction is included in all models. The two-way model comprising Day, Temp and their interaction is referred to as the null model.

- Salt (different levels for the different analyses)
  - i. 3.0% NaCl or 2.4% NaCl+0.6% KCl
  - ii. 3.0% NaCl or 2.4% NaCl+0.6% KCl
  - iii. 3.0% NaCl or 2.4% NaCl+0.6% KCl
  - iv. 2.0% NaCl+0.5% KCl or 2.4% NaCl+0.6% KCl
  - v. 2.0% NaCl + 0.5% KCl or 2.4% NaCl+0.6% KCl
- Provian K (0, 0.5 % and 0.9 %) – part ii + v
- Provian NDV (0, 0.5 % and 0.9 %) – part iii + v
- Concentration of Provian (K or NDV) (0.5% or 0.9%) – part iv
- Salt reduction with salt as 2.4% NaCl+0.6% KCl, 2.0% NaCl (part v)
- e: random error

All models are compared to a null model, describing the growth of *L. monocytogenes* using day and temperature only, according to

$$y \sim \textit{Day} + \textit{Temp} + \textit{Day:Temp} + e$$

(S1)

The colon indicates an interaction effect.

### i) Effect of different mineral salts

Factors included in the modelling in addition to day and temperature are

- 3.0% NaCl (control),
- 2.4% NaCl+0.6% KCl
- Nutek
- Smart Salt

The model was only nearly significant compared to the null model (Eq. S1, p-value 0.09). Table ANOVA S2a shows the ANOVA for the full model.

**Table ANOVA S2a:** ANOVA (type III) for analysis i), effect of different mineral salts on growth of *L. monocytogenes*.

|             | Sum Sq   | Df  | F value   | Pr(>F) | Explained<br>Variance |
|-------------|----------|-----|-----------|--------|-----------------------|
| (Intercept) | 6066.349 | 1   | 42612.213 | 0.000  |                       |
| Salt        | 2.865    | 3   | 6.709     | 0.000  | 0.656                 |
| Temp        | 130.706  | 1   | 918.128   | 0.000  | 29.927                |
| Day         | 262.437  | 3   | 614.483   | 0.000  | 60.089                |
| Salt:Temp   | 0.081    | 3   | 0.189     | 0.904  | 0.018                 |
| Salt:Day    | 0.362    | 9   | 0.282     | 0.979  | 0.083                 |
| Temp:Day    | 20.796   | 3   | 48.692    | 0.000  | 4.761                 |
| Residuals   | 19.504   | 137 |           |        | 4.466                 |

## ii) Effect of Provian K

Factors included in the model in addition to day and temperature are

- Provian K (0, 0.5% or 0.9%)
- Salt (3.0% NaCl or 2.4% NaCl+0.6% KCl)

**Table ANOVA S2b:** ANOVA (type III) for analysis ii), effect of Provian K for different salts and concentrations on growth of *L. monocytogenes*.

|                     | Sum Sq   | Df  | F value   | Pr(>F) | Explained<br>Variance |
|---------------------|----------|-----|-----------|--------|-----------------------|
| (Intercept)         | 5409.407 | 1   | 19617.614 | 0.000  |                       |
| Provian K           | 232.394  | 2   | 421.398   | 0.000  | 32.936                |
| Salt                | 4.140    | 1   | 15.013    | 0.000  | 0.587                 |
| Temp                | 164.870  | 1   | 597.913   | 0.000  | 23.366                |
| Day                 | 207.481  | 3   | 250.815   | 0.000  | 29.405                |
| Provian K:Salt      | 1.862    | 2   | 3.376     | 0.036  | 0.264                 |
| Provian K:Temp      | 0.468    | 2   | 0.849     | 0.429  | 0.066                 |
| Provian K:Day       | 17.407   | 6   | 10.521    | 0.000  | 2.467                 |
| Salt:Temp           | 0.586    | 1   | 2.124     | 0.147  | 0.083                 |
| Temp:Day            | 11.223   | 3   | 13.567    | 0.000  | 1.591                 |
| Provian K:Salt:Temp | 1.525    | 2   | 2.765     | 0.066  | 0.216                 |
| Provian K:Temp:Day  | 10.697   | 6   | 6.466     | 0.000  | 1.516                 |
| Residuals           | 52.943   | 192 |           |        | 7.503                 |

### iii) Effect of Provian NDV

Factors included in the model in addition to day and temperature are

- Provian NDV (denoted Provian in the table, at concentrations 0, 0.5% or 0.9%)
- Salt (3.0% NaCl or 2.4% NaCl+0.6% KCl)

**Table ANOVA S2c:** ANOVA (type III) for analysis iii), effect of Provian NDV for different salts and concentrations on growth of *L. monocytogenes*

|                  | Sum Sq   | Df  | F value   | Pr(>F) | Explained Variance |
|------------------|----------|-----|-----------|--------|--------------------|
| (Intercept)      | 5837.298 | 1   | 27339.249 | 0.000  |                    |
| Provian          | 172.976  | 2   | 405.070   | 0.000  | 24.783             |
| Salt             | 0.463    | 1   | 2.169     | 0.142  | 0.066              |
| Temp             | 188.199  | 1   | 881.440   | 0.000  | 26.964             |
| Day              | 253.054  | 3   | 395.064   | 0.000  | 36.257             |
| Provian:Salt     | 3.802    | 2   | 8.903     | 0.000  | 0.545              |
| Provian:Temp     | 0.186    | 2   | 0.435     | 0.648  | 0.027              |
| Provian:Day      | 8.255    | 6   | 6.444     | 0.000  | 1.183              |
| Temp:Day         | 8.304    | 3   | 12.964    | 0.000  | 1.190              |
| Provian:Temp:Day | 20.866   | 6   | 16.288    | 0.000  | 2.990              |
| Residuals        | 41.849   | 196 |           |        | 5.996              |

#### iv) Comparison of Provian type (K or NDV) at different concentrations

Factors included in the model in addition to day and temperature are

- Provian type (denoted Type, levels and K or NDV)
- Provian concentration (denoted Conc., 0.5% or 0.9%).

**Table ANOVA S2d:** ANOVA (type III) for analysis iv), effect of Provian type (K or NDV) for different concentrations of different salts and concentrations on growth of *L. monocytogenes*

|               | Sum Sq  | Df  | F value  | Pr(>F) | Explained Variance |
|---------------|---------|-----|----------|--------|--------------------|
| (Intercept)   | 5261.49 | 1   | 13985.73 | 0.00   |                    |
| Type          | 4.58    | 1   | 12.18    | 0.00   | 0.84               |
| Conc          | 22.64   | 1   | 60.19    | 0.00   | 4.17               |
| Temp          | 205.57  | 1   | 546.42   | 0.00   | 37.89              |
| Day           | 200.26  | 3   | 177.44   | 0.00   | 36.91              |
| Type: Conc    | 0.92    | 1   | 2.46     | 0.12   | 0.17               |
| Type:Temp     | 0.30    | 1   | 0.81     | 0.37   | 0.06               |
| Type:Day      | 1.51    | 3   | 1.33     | 0.26   | 0.28               |
| Temp:Day      | 15.42   | 3   | 13.67    | 0.00   | 2.84               |
| Type:Temp:Day | 2.94    | 3   | 2.60     | 0.05   | 0.54               |
| Residuals     | 88.41   | 235 |          |        | 16.29              |

## v) Effect of salt reduction and Provian type

Factors included in the model in addition to day and temperature are

- Salt (2.0% NaCl + 0.5% KCl or 2.4% NaCl + 0.6% KCl)
- Provian type (denoted Type; K or NDV) and
- Provian concentration (denoted Conc, 0.5% or 0.9%).

**Table ANOVA S2e:** ANOVA (type III) for analysis v), effect of Provian type (K or NDV), Provian concentration in product with reduced salt levels on growth of *L. monocytogenes*

|                | Sum Sq   | Df  | F value   | Pr(>F) | Explained Variance |
|----------------|----------|-----|-----------|--------|--------------------|
| (Intercept)    | 5360.478 | 1   | 16750.243 | 0.000  |                    |
| Type           | 5.893    | 1   | 18.413    | 0.000  | 1.027              |
| Conc           | 19.804   | 1   | 61.884    | 0.000  | 3.451              |
| Salt           | 4.489    | 1   | 14.027    | 0.000  | 0.782              |
| Temp           | 222.873  | 1   | 696.425   | 0.000  | 38.841             |
| Day            | 216.568  | 3   | 225.575   | 0.000  | 37.742             |
| Type:Conc      | 0.332    | 1   | 1.038     | 0.309  | 0.058              |
| Type:Salt      | 0.751    | 1   | 2.345     | 0.127  | 0.131              |
| Type:Temp      | 1.464    | 1   | 4.575     | 0.033  | 0.255              |
| Type:Day       | 2.542    | 3   | 2.648     | 0.050  | 0.443              |
| Conc:Salt      | 3.212    | 1   | 10.038    | 0.002  | 0.560              |
| Conc:Day       | 2.687    | 3   | 2.798     | 0.041  | 0.468              |
| Salt:Temp      | 1.920    | 1   | 6.000     | 0.015  | 0.335              |
| Temp:Day       | 16.046   | 3   | 16.713    | 0.000  | 2.796              |
| Type:Conc:Salt | 0.982    | 1   | 3.070     | 0.081  | 0.171              |
| Residuals      | 74.246   | 232 |           |        | 12.939             |
